# Supplementary material for: Protocol for a randomised trial of early kangaroo mother care compared to standard care on survival of pre-stabilised preterm neonates in The Gambia (eKMC)
Source: PubMed Central journal article supplement (PMC7059319; doi:10.1186/s13063-020-4149-y), 2020-03-06
Supplement: 13063_2020_4149_MOESM2_ESM.pdf [file 13063_2020_4149_MOESM2_ESM.pdf]

|          |                                                                                                          | <b>2 points</b>                                                            | <b>1 point</b>                                                                                                                         | <b>0 points</b>                                                                                                                                                                                                                                                                           |
|----------|----------------------------------------------------------------------------------------------------------|----------------------------------------------------------------------------|----------------------------------------------------------------------------------------------------------------------------------------|-------------------------------------------------------------------------------------------------------------------------------------------------------------------------------------------------------------------------------------------------------------------------------------------|
| <b>A</b> | <b>Cardiovascular stability:</b><br><br>Heart rate<br>(beats per minute)                                 | 120 – 160 for 10 mins continuously                                         | 100 - 120<br>or<br>161 – 200 for >5 out of 10 mins                                                                                     | <100<br>or<br>>200 continuously for >5 out of 10 mins                                                                                                                                                                                                                                     |
| <b>B</b> | <b>Respiratory stability:</b><br><br>Breathing pattern and respiratory rate (RR)<br>(breaths per minute) | Regular breathing<br><br>And/or<br><br>RR 20 – 60 continuously for 10 mins | Irregular or periodic breathing with 1 or more pauses for <10 secs<br><br>And / or<br><br>RR 20 – 29 or 61 – 100 for >5 out of 10 mins | Irregular breathing with 1 or more pauses for >10 secs<br><br>And / or<br><br>Irregular breathing with 1 or more pauses for <10 seconds but which result in oxygen saturation <88%<br><br>Need for bag-valve-mask ventilation<br><br>And / or<br><br>RR <20 or >100 for >5 out of 10 mins |
| <b>C</b> | <b>Oxygen saturation (%)</b>                                                                             | >88% continuously in room air for 10 mins                                  | >88% continuously for >5 out of 10 mins in oxygen                                                                                      | <88% continuously for >5 out of 10 mins despite oxygen                                                                                                                                                                                                                                    |

Stable = 6 points; Mild – moderately unstable = 3 – 5 points; Severely unstable = 0 – 2 points
